# Supplementary material for: An Italian sacrifice to the COVID-19 epidemic
Source: PubMed Central journal article supplement — Eur Respir J. 2020 Jun 11;55(6):2001445. doi: 10.1183/13993003.01445-2020 (PMC7236835; doi:10.1183/13993003.01445-2020), 2020-06-11
Supplement: ERJ-01445-2020.Shareable.pdf [file ERJ-01445-2020.Shareable.pdf]

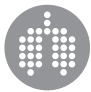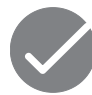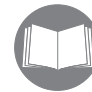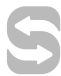

SHAREABLE PDF

# An Italian sacrifice to the COVID-19 epidemic

Stefano Nava<sup>1</sup>, Roberto Tonelli<sup>2,3</sup> and Enrico M. Clini <sup>3</sup>

**Affiliations:** <sup>1</sup>University Hospital of Bologna S. Orsola-Malpighi, Respiratory Diseases and Respiratory Intensive Care Unit, Dept of Medical Sciences DIMES, University of Bologna Alma Mater, Bologna, Italy. <sup>2</sup>Clinical and Experimental Medicine PhD Program, University of Modena Reggion Emilia, Modena, Italy. <sup>3</sup>University Hospital of Modena Policlinico, Respiratory Diseases Unit, Dept of Medical and Surgical Sciences SMECHIMAI, University of Modena Reggion Emilia, Modena, Italy.

**Correspondence:** Enrico M. Clini, University of Modena, University Hospital of Modena Policlinico, Via del Pozzo 71, Modena, 41141, Italy. E-mail: enrico.clini@unimore.it

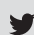

@ERSpublications

**The report of Italian doctors who died during the COVID-19 outbreak should inform us not to forget**  
<https://bit.ly/3cbSbkU>

**Cite this article as:** Nava S, Tonelli R, Clini EM. An Italian sacrifice to the COVID-19 epidemic. *Eur Respir J* 2020; 55: 2001445 [<https://doi.org/10.1183/13993003.01445-2020>].

This single-page version can be shared freely online.

As reported by Newsweek magazine on 4 April 2020 [1], coronavirus has killed over 100 doctors and nurses around the world, nearly half of whom are reported to be in Italy. This report, however, underestimated the size of the problem. To date, 151 doctors and more than 40 nurses have died in Italy from coronavirus disease 2019 (COVID-19).
